# Supplementary material for: Rate-independent and ultra-stable low-temperature sodium storage in pseudocapacitive TiO2nanowires
Source: Royal Society of Chemistry journal article supplement (doi:10.1039/c9ta05039f), 2019-01-01
Supplement: c9ta05039f1.pdf [file c9ta05039f1.pdf]

## Electronic Supplementary Information

### Rate-independent and ultra-stable low-temperature sodium storage in pseudocapacitive TiO<sub>2</sub> nanowires

Dongmei Lin,<sup>‡a</sup> Kaikai Li,<sup>‡a</sup> Qian Wang,<sup>a</sup> Linlong Lyu,<sup>a</sup> Baohua Li<sup>\*b</sup> and Limin Zhou<sup>\*a</sup>

<sup>a</sup> Department of Mechanical Engineering, The Hong Kong Polytechnic University, Hong Kong, China.

<sup>b</sup> Engineering Laboratory for the Next Generation Power and Energy Storage Batteries, Graduate School at Shenzhen, Tsinghua University, Shenzhen 518055, China.

Corresponding Authors

\*E-mail: [mmlmzhou@polyu.edu.hk](mailto:mmlmzhou@polyu.edu.hk) (Prof. Limin Zhou)

\*E-mail: [libh@sz.tsinghua.edu.cn](mailto:libh@sz.tsinghua.edu.cn) (Prof. Baohua Li)

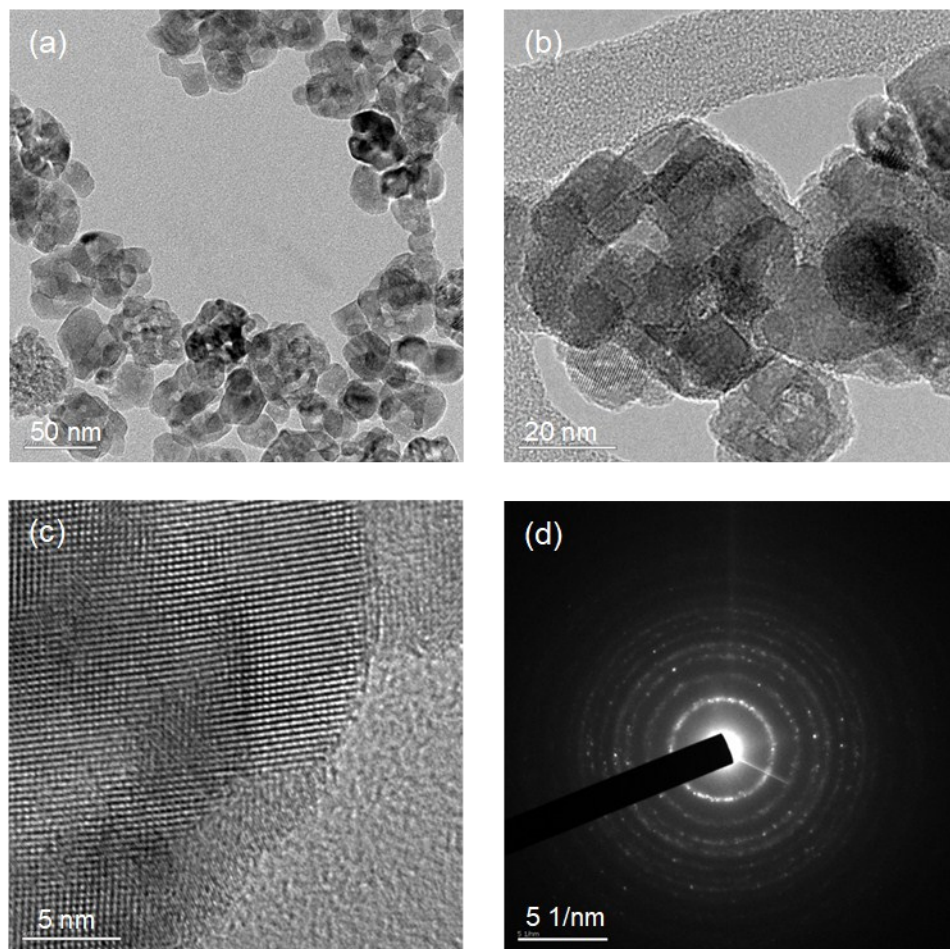

**Fig. S1** (a-b) TEM images of the precursor  $\text{TiO}_2$  nanoparticles. (c) HRTEM image of the precursor  $\text{TiO}_2$  nanoparticle. (d) SAED pattern of the precursor  $\text{TiO}_2$  nanoparticles.

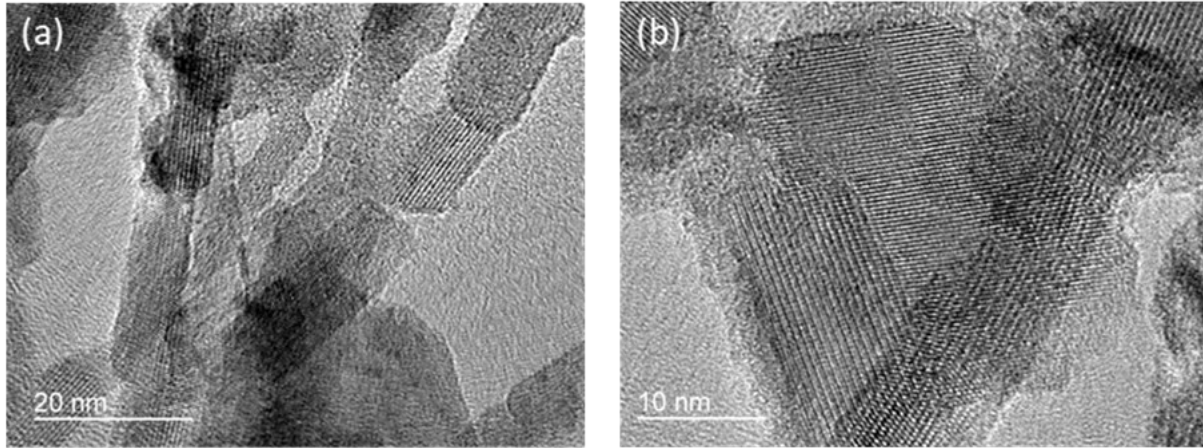

**Fig. S2** HRTEM images of dual-phase TiO<sub>2</sub> nanowires.

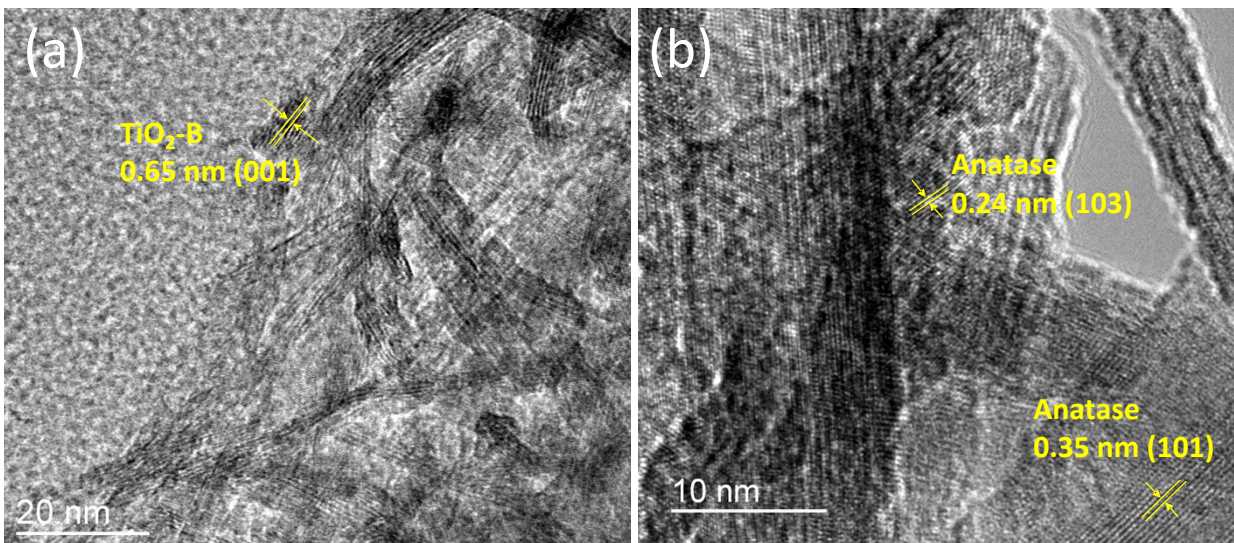

**Fig. S3** HRTEM images of (a) pure TiO<sub>2</sub>-B and (b) pure anatase nanowires.

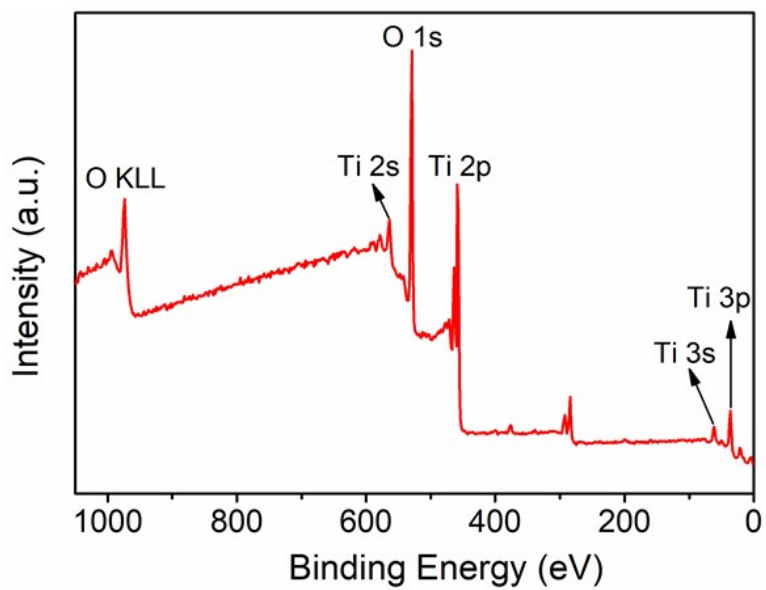

**Fig. S4** XPS spectrum of the dual-phase TiO<sub>2</sub> nanowires.

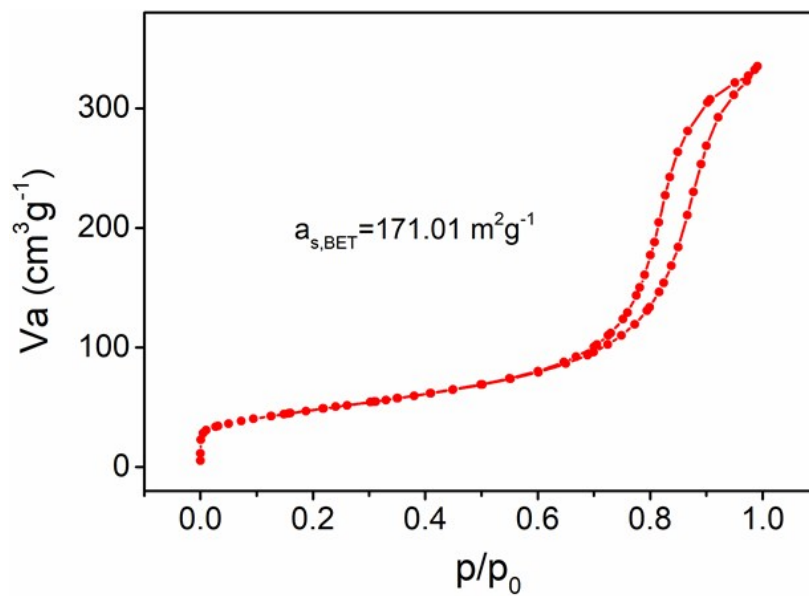

**Fig. S5** Nitrogen adsorption/desorption isotherm of the dual-phase TiO<sub>2</sub> nanowires.



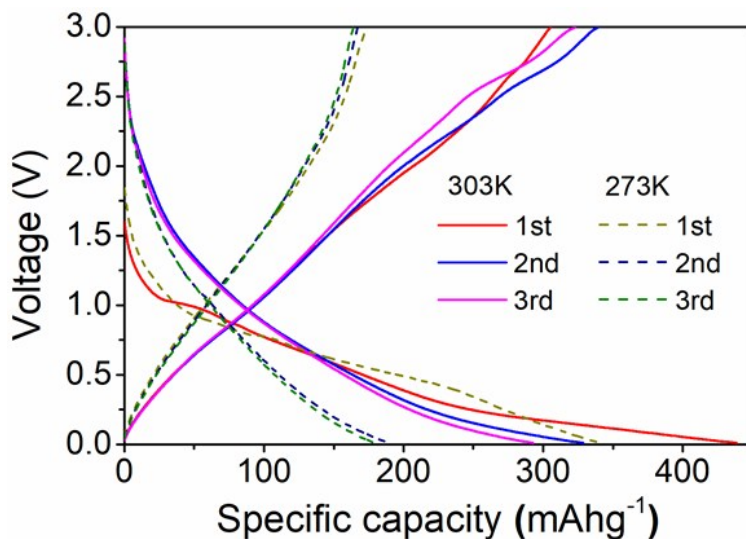

**Fig. S6** The first three charge–discharge voltage profiles at a rate of 0.25 C (1 C = 335 mA g<sup>-1</sup>) between 0.01 V and 3 V at 303 K and 273 K.

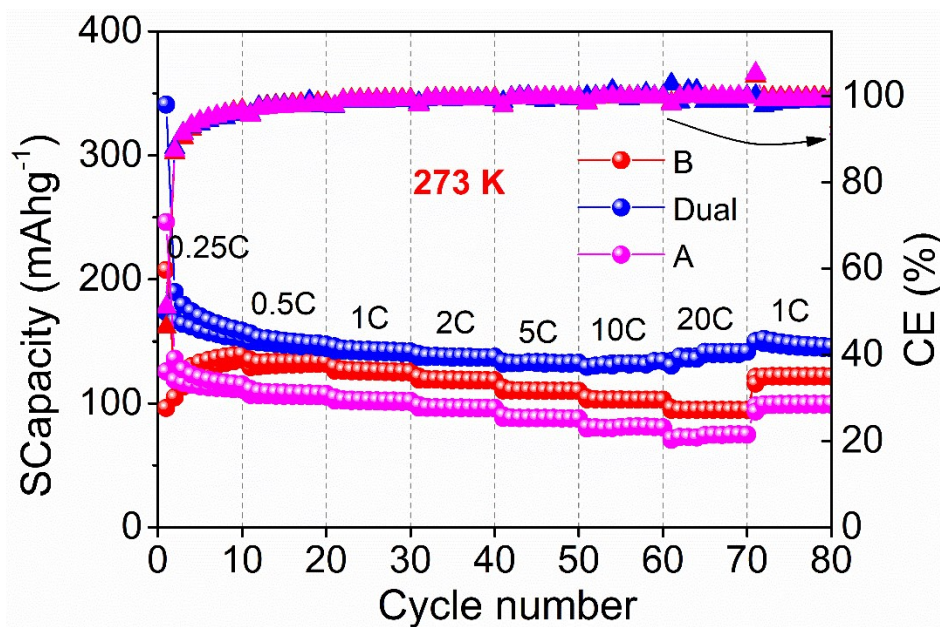

**Fig. S7** Comparison of the rate-performance of the TiO<sub>2</sub> nanowires with different phases at 273 K.

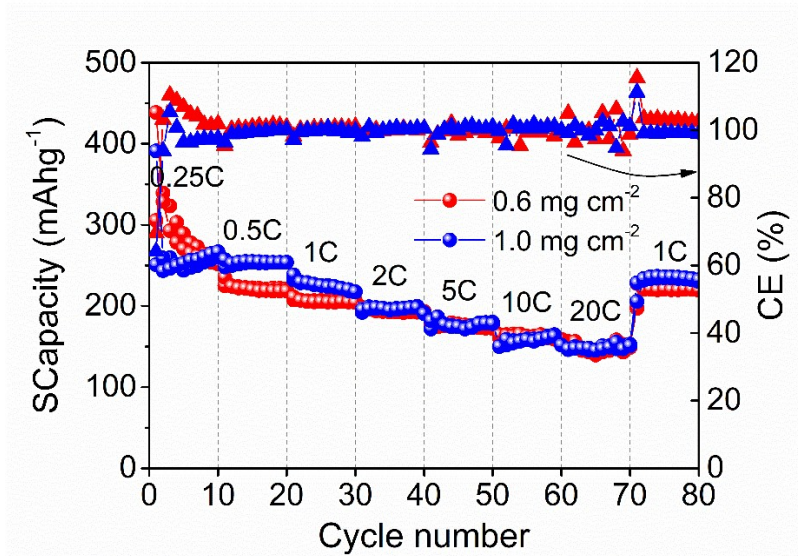

**Fig. S8** Comparison of the rate-performance of the dual-phase  $\text{TiO}_2$  nanowire electrodes with different mass loadings.

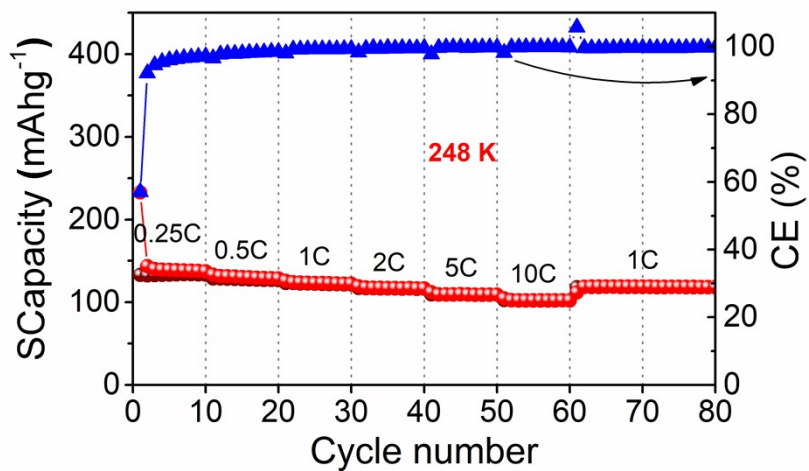

**Fig. S9** Rate-performance of the dual-phase  $\text{TiO}_2$  nanowires at 248 K.

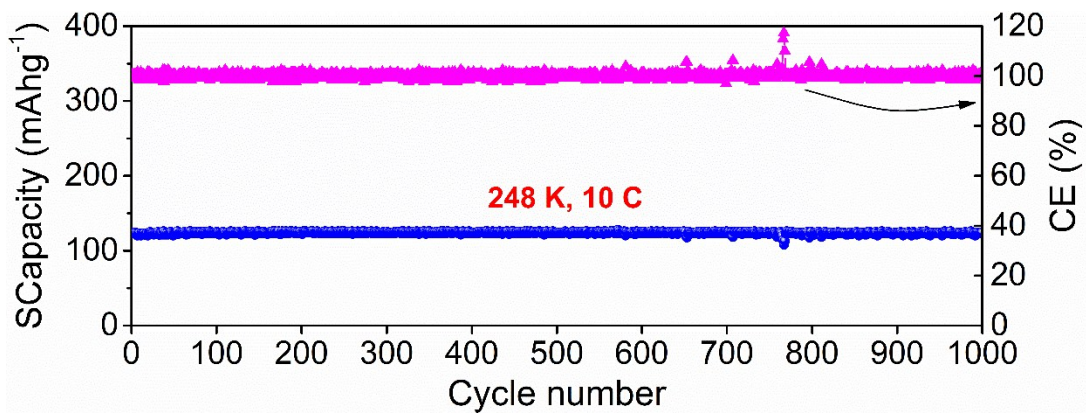

**Fig. S10** Cycling performance of the dual-phase TiO<sub>2</sub> nanowire anode at a rate of 10 C for 1000 cycles at 248 K.

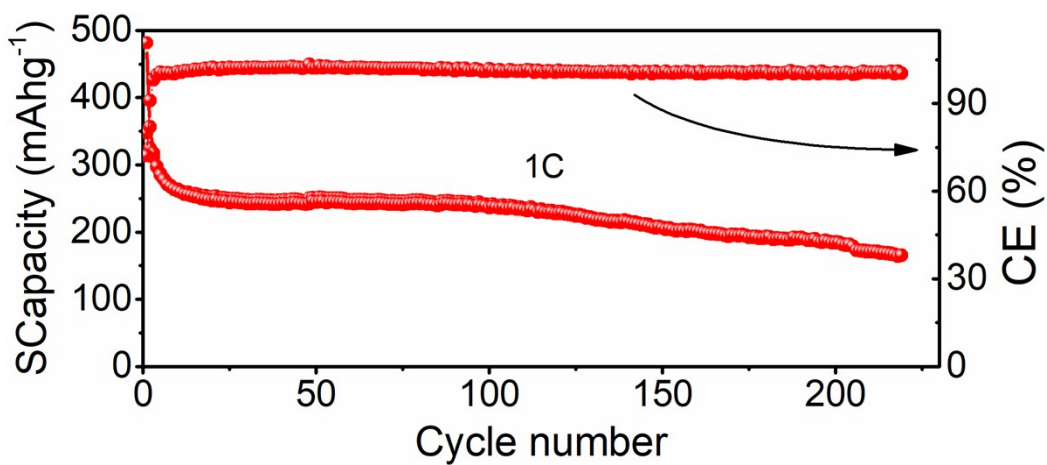

**Fig. S11** Cycling performance of the dual-phase TiO<sub>2</sub> nanowire anode at a rate of 1 C for more than 200 cycles at 303 K.

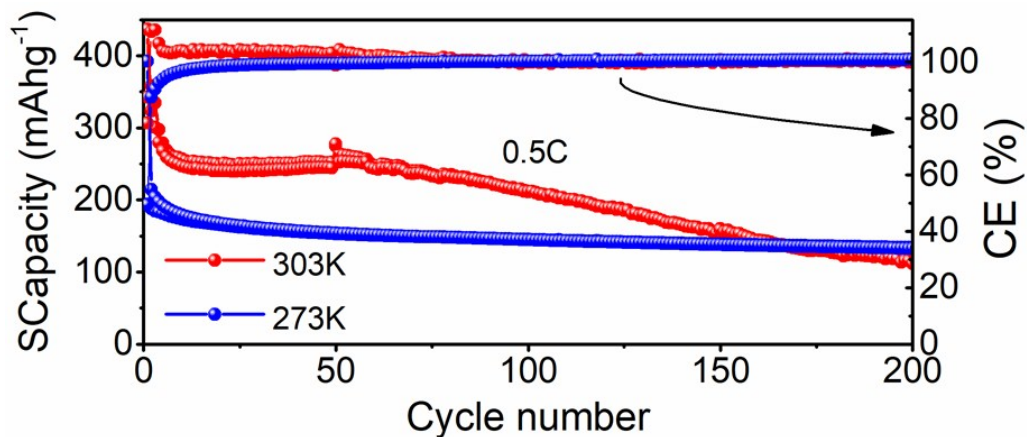

**Fig. S12** Cycling performance of the dual-phase TiO<sub>2</sub> nanowire anode at a rate of 0.5 C for 200 cycles at 303 K and 273 K.

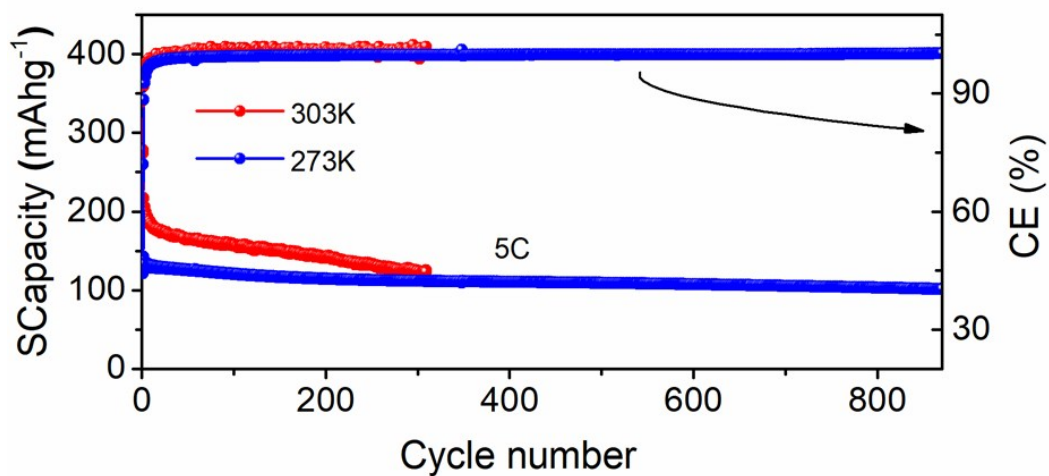

**Fig. S13** Cycling performance at rate of 5 C at 303 K and 273 K.



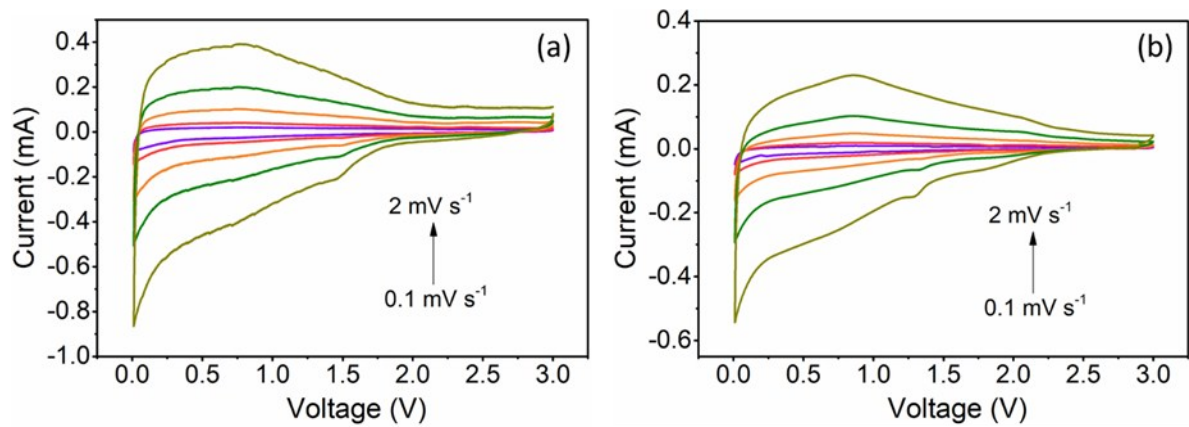

**Fig. S14** Cyclic Voltammetry (CV) of the dual-phase TiO<sub>2</sub> nanowire anode at various scan rates from 0.1 to 20 mV s<sup>-1</sup> at (a) 303 K and (b) 273 K.

**Table S1.** Comparison of the initial coulombic efficiency (ICE) of different TiO<sub>2</sub>-based anode materials for SIBs reported in literatures at room temperature.

| <b>TiO<sub>2</sub>-based anode materials</b> | <b>ICE (%)</b> | <b>Ref</b>       |
|----------------------------------------------|----------------|------------------|
| TiO <sub>2</sub> @NFG HPHNSs                 | 49             | 1                |
| a-TiO <sub>2</sub> -x/r-TiO <sub>2</sub> -x  | 40             | 2                |
| C-TiO <sub>2</sub> (15 nm)                   | 32.6           | 3                |
| C-TiO <sub>2</sub> (11 nm)                   | 38.2           | 3                |
| pure TiO <sub>2</sub>                        | 59.4           | 4                |
| boron doping TiO <sub>2</sub>                | 62.5           | 4                |
| anatase TiO <sub>2</sub> nanoparticles       | 42             | 5                |
| anatase TiO <sub>2</sub> nanorods            | <30            | 6                |
| anatase TiO <sub>2</sub> nanocrystals        | 41.9           | 7                |
| <b>dual-phase TiO<sub>2</sub> nanowires</b>  | <b>69.6</b>    | <b>this work</b> |

---

**Table S2.** Comparison of the charge transfer resistance of different TiO<sub>2</sub>-based anode materials for SIBs reported in literatures at room temperature.

| TiO <sub>2</sub> -based anode materials                                    | Charge transfer resistance R <sub>ct</sub> (Ω) | Ref              |
|----------------------------------------------------------------------------|------------------------------------------------|------------------|
| Nanocrystalline TiO <sub>2</sub> (B)                                       | 73                                             | 8                |
| mesoporous TiO <sub>2</sub> nanofibers                                     | 188                                            | 9                |
| NaTi <sub>2</sub> (PO <sub>4</sub> ) <sub>3</sub> -Rutile TiO <sub>2</sub> | 74.0                                           | 10               |
| anatase TiO <sub>2</sub> nanocrystal                                       | 108.7                                          | 11               |
| Anatase@TiO <sub>2</sub> (B) bicrystalline                                 | 75                                             | 12               |
| Boron-doped TiO <sub>2</sub>                                               | 310                                            | 4                |
| N-TiO <sub>2</sub> /C-dots composite                                       | 152                                            | 13               |
| Sn-doped TiO <sub>2</sub> nanotubes                                        | 162.4                                          | 14               |
| <b>dual-phase TiO<sub>2</sub> nanowires</b>                                | <b>4.95</b>                                    | <b>this work</b> |

---

**Table S3.** Charge transfer resistance of the dual-phase TiO<sub>2</sub> nanowire anode for SIBs at different temperatures.

| Temperature | Charge transfer resistance Rct ( $\Omega$ ) |
|-------------|---------------------------------------------|
| 0           | 5.81                                        |
| 10          | 5.6                                         |
| 20          | 4.95                                        |
| 30          | 4.68                                        |
| 40          | 4.51                                        |
| 50          | 4.09                                        |



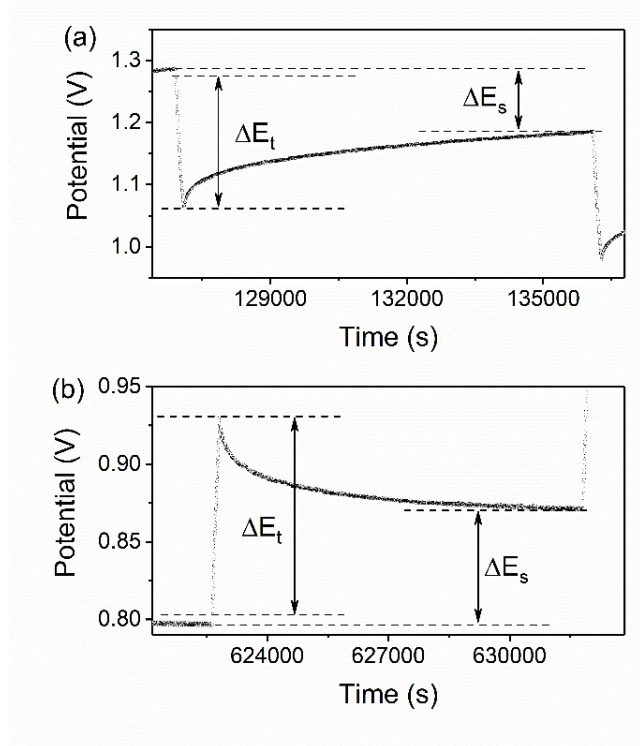

**Fig. S15** Voltage profile for a single titration of the GITT (a) discharge and (b) charge.

The apparent  $\text{Na}^+$  diffusion coefficients  $D_{app}$  were calculated using the following equation,<sup>15</sup> by assuming that  $\text{Na}^+$  transport in the electrode obeys Fick's second law:

$$D_{app} = \frac{4}{\pi\tau} \left( \frac{m_B V_M}{M_B S} \right)^2 \left( \frac{\Delta E_s}{\Delta E_t} \right)^2$$

where  $\tau$  is current pulse time,  $m_B$ ,  $V_M$  and  $M_B$  are the mass, molar volume and atomic weight of the electrode material  $\text{TiO}_2$ ,  $S$  is the area of the electrode.

GITT measurements consisting of a series of current pulses were applied to the pouch cell at a current density of 0.5 C (1 C = 335 mA g<sup>-1</sup>) for 3 min, each followed by a 150 min relaxation period. The relaxation time of 150 min was selected to allow full relaxation of the open-circuit potential (OCP), and to minimize the self-discharge during the test. The voltage window of GITT measurement was 0.01 V to 3 V. Prior to the GITT measurement, the cell was galvanostatic cycled at 0.5 C for 5 cycles between 0.01 V to 3 V.

## References

- 1 B. Li, B. Xi, Z. Feng, Y. Lin, J. Liu, J. Feng, Y. Qian and S. Xiong, *Adv. Mater.*, 2018, **30**, 1705788.
- 2 Y. Wu, Y. Jiang, J. Shi, L. Gu and Y. Yu, *Small*, 2017, **13**, 1700129.
- 3 M. N. Tahir, B. Oschmann, D. Buchholz, X. Dou, I. Lieberwirth, M. Panthöfer, W. Tremel, R. Zentel and S. Passerini, *Adv. Energy Mater.*, 2016, **6**, 1501489.
- 4 B. Wang, F. Zhao, G. Du, S. Porter, Y. Liu, P. Zhang, Z. Cheng, H.K. Liu and Z. Huang, *ACS Appl. Mater. Interfaces*, 2016, **8**, 16009-16015.
- 5 L. Wu, D. Buchholz, D. Bresser, L. Gomes Chagas and S. Passerini, *J. Power Sources*, 2014, **251**, 379-385.
- 6 K.-T. Kim, G. Ali, K.Y. Chung, C.S. Yoon, H. Yashiro, Y.-K. Sun, J. Lu, K. Amine and S.-T. Myung, *Nano Lett.*, 2014, **14**, 416-422.
- 7 Y. Xu, E.M. Lotfabad, H. Wang, B. Farbod, Z. Xu, A. Kohandehghan and D. Mitlin, *Chem. Commun.*, 2013, **49**, 8973-8975.
- 8 L. Wu, D. Bresser, D. Buchholz and S. Passerini, *J. Electrochem. Soc.*, 2015, **162**, A3052-A3058.
- 9 Y. Wu, X. Liu, Z. Yang, L. Gu and Y. Yu, *Small*, 2016, **12**, 3522-3529.
- 10 J. Yang, H. Wang, P. Hu, J. Qi, L. Guo and L. Wang, *Small*, 2015, **11**, 3744-3749.
- 11 Y. Xu, E.M. Lotfabad, H. Wang, B. Farbod, Z. Xu, A. Kohandehghan and D. Mitlin, *Chem. Commun.*, 2013, **49**, 8973-8975.
- 12 Z. Yan, L. Liu, J. Tan, Q. Zhou, Z. Huang, D. Xia, H. Shu, X. Yang and X. Wang, *J. Power Sources*, 2014, **269**, 37-45.
- 13 Y. Yang, X. Ji, M. Jing, H. Hou, Y. Zhu, L. Fang, X. Yang, Q. Chen and C.E. Banks, *J. Mater. Chem. A*, 2015, **3**, 5648-5655.
- 14 D. Yan, C. Yu, Y. Bai, W. Zhang, T. Chen, B. Hu, Z. Sun and L. Pan, *Chem. Commun.*, 2015, **51**, 8261-8264.
- 15 W. Weppner and R. A. Huggins, *J. Electrochem. Soc.*, 1977, **124**, 1569-1578.
